# Supplementary material for: Role of Elevated Ozone on Development and Metabolite Contents of Lemongrass [Cymbopogon flexuosus (Steud.) (Wats.)]
Source: MDPI journal article supplement (doi:10.3390/metabo13050597), 2023-04-27
Supplement: s1 [file s1]

Supplementary Table S1: Variation in the metabolic profile of leaf extract due to the EO exposure in *Cymbopogon flexuosus*

| S. no. | Compounds                                                                      | Retention peak area (%) |                 |                 |
|--------|--------------------------------------------------------------------------------|-------------------------|-----------------|-----------------|
|        |                                                                                | AO                      | EO <sub>1</sub> | EO <sub>2</sub> |
| 1      | Propylcannabinol                                                               | 0.69                    | -               | -               |
| 2      | Elemol                                                                         | 0.71                    | -               | -               |
| 3      | 2-(tert-Butyl)-4-methoxyphenyl acetate                                         | 0.07                    | -               | -               |
| 4      | 3-Deoxy-d-mannonic lactone                                                     | 0.78                    | -               | -               |
| 5      | Psoralidine monomethyl ether                                                   | 0.8                     | -               | -               |
| 6      | 6,6-dimethyl-2,4-heptadiene                                                    | 0.61                    | -               | -               |
| 7      | 2-hexadecen-1-ol, 3,7,11,15-tetramethyl-, [R- [R*, R*-(E)]]                    | 0.81                    | -               | -               |
| 8      | Sitosterol                                                                     | 1.07                    | -               | -               |
| 9      | 2,6,11,15-Tetramethyl-hexadeca-2,6,8,10,14-pentaene                            | 1.41                    | -               | -               |
| 10     | Stigmasta-5,22-dien-3-ol                                                       | 1.77                    | -               | -               |
| 11     | 2-methoxy-4-vinylphenol                                                        | 1.05                    | -               | -               |
| 12     | 2,6-octadien-1-ol, 3,7-dimethyl-, (E)-                                         | 3.59                    | -               | -               |
| 13     | Bicyclo [7.2.0] undec-4-ene, 4,11,11-trimethyl-8-methylene-, [1R-(1R*,4Z,9S*)] | 2.36                    | -               | -               |
| 14     | Cubebanol                                                                      | 2.18                    | -               | -               |
| 15     | 4H-Pyran-4-one, 2,3-dihydro-3,5-dihydroxy-6-methyl                             | 1.56                    | -               | -               |
| 16     | Hexane, 1-bromo-6-chloro-                                                      | 3.05                    | -               | -               |
| 17     | 4-heptanol                                                                     | 1.81                    | -               | -               |
| 18     | 2,4-cyclohexadiene-1-methanol, $\alpha$ , $\alpha$ .,4-trimethyl               | -                       | 0.7             | -               |

|    |                                                                                           |       |      |       |
|----|-------------------------------------------------------------------------------------------|-------|------|-------|
| 19 | trans-p-Mentha-2,8-dienol                                                                 | -     | 3.87 | -     |
| 20 | Sesquisabinene hydrate                                                                    | -     | 2.8  | -     |
| 21 | 6-isopropenyl-3-(methoxymethoxy)-3-methyl-1-cyclohexene                                   | -     | 1.15 | -     |
| 22 | Glutaric acid, myrtenyl 3-methylbut-2-en-1-yl ester                                       | -     | 4.43 | -     |
| 23 | Cholest-8-en-3-ol                                                                         | -     | 0.16 | -     |
| 24 | Octadecanal                                                                               | -     | 0.05 | -     |
| 25 | Bicyclo[3.1.1]heptan-3-one, 2-hydroxy-2,6,6-trimethyl                                     | -     | -    | 0.83  |
| 26 | 17-(1,5-Dimethyl-3-phenylthiohex-4-enyl)-4,4,10,13,14-pentamethyl-2,3,4,5,6,7,10,11,12,13 | -     | -    | 0.96  |
| 27 | Ergost-5-en-3-ol                                                                          | -     | -    | 0.76  |
| 28 | Stigmasterol                                                                              | -     | -    | 1.04  |
| 29 | 2E,6E)-3,7,11-Trimethyldodeca-2,6,10-trienyl propionate                                   | -     | -    | 2.24  |
| 30 | Citral                                                                                    | -     | -    | 2.11  |
| 31 | Licarín A                                                                                 | -     | -    | 0.83  |
| 32 | Linalool                                                                                  | 0.55  | -    | 0.43  |
| 33 | m-Camphorene                                                                              | 0.79  | 1.54 | 2.81  |
| 34 | Squalene                                                                                  | 0.83  | 0.74 | 1.15  |
| 35 | Palmitic acid                                                                             | 4.94  | 0.67 | 5.31  |
| 36 | Lanosterol                                                                                | 4.33  | 5.73 | 9.14  |
| 37 | Geranyl stearate                                                                          | 0.23  | 5.9  | 0.32  |
| 38 | Geranyl linolenate                                                                        | 10.87 | 8.33 | 8.18  |
| 39 | D:C-Friedo-B': A'-neogammacer-9(11)-ene, 3-methoxy-, (3. $\beta$ )-                       | 3.37  | 5.97 | 0.9   |
| 40 | Geranyl acetate                                                                           | 4.62  | 6.11 | 12.16 |
| 41 | Geranyl linoleate                                                                         | 6.99  | 6.83 | 6.75  |

|    |                                                                                                     |      |      |       |
|----|-----------------------------------------------------------------------------------------------------|------|------|-------|
| 42 | 1,2,3,4,4a,5,6,8a-octahydro-7-methyl-4-methylene-1-(1-methylethyl)-, (1. $\alpha$ , / Neophytadiene | 3.98 | 3.38 | 1.31  |
| 43 | 6-Methyl-4,6-bis(4-methylpent-3-en-1-yl) cyclohexa-1,3-dienecarbaldehyde                            | 4.67 | 7.63 | 6.27  |
| 44 | Vitamin E                                                                                           | 1.67 | 1.88 | 2     |
| 45 | 9,19-Cyclolanost-25-en-3-ol, 24-methyl-, (3. $\beta$ ., 24S)-                                       | 2.21 | 2.58 | -     |
| 46 | Citronellyl linolenate                                                                              | 0.18 | 8.33 | -     |
| 47 | Cadinene < $\gamma$ >                                                                               | 4.89 | -    | 5.78  |
| 48 | 2,6,10,14-Hexadecatetraen-1-ol, 3,7,11,15-tetramethyl-, acetate, (E, E, E)-                         | 0.64 | -    | 1.11  |
| 49 | Humulene < $\alpha$ >                                                                               |      | 5.68 | 0.42  |
| 50 | $\beta$ - Citral                                                                                    | -    | 1.54 | 11.71 |
| 51 | Monopentyl Phthalate                                                                                | -    | 1.04 | 0.31  |
| 52 | Caryophyllene                                                                                       | -    | 1.65 | 2.01  |

Supplementary Table S2: Variation in the metabolic profile of essential oil due to the EO exposure in *Cymbopogon flexuosus*

| S. no. | Compounds                                                | Retention peak area (%) |                 |                 |
|--------|----------------------------------------------------------|-------------------------|-----------------|-----------------|
|        |                                                          | AO                      | EO <sub>1</sub> | EO <sub>2</sub> |
| 1      | 2,2-Dimethylocta-3,4-dienal                              | 0.23                    | -               | -               |
| 2      | Citronellal                                              | 0.12                    | -               | -               |
| 3      | Cubebol                                                  | 1.65                    | -               | -               |
| 4      | p-Menth-3-en-9-ol                                        | -                       | 0.09            | -               |
| 5      | $\alpha$ -Ylangene                                       | -                       | 0.2             | -               |
| 6      | 1,4,8-cycloundecatriene, 2,6,6,9-tetramethyl-, (E, E, E) | -                       | 0.62            | -               |
| 7      | Germacrene D                                             | -                       | 0.2             | -               |

|    |                                                                                                     |       |       |       |
|----|-----------------------------------------------------------------------------------------------------|-------|-------|-------|
| 8  | Cuparene                                                                                            | -     | 0.13  | -     |
| 9  | Bisabolene                                                                                          | -     | 0.13  | -     |
| 10 | Tricyclo [2.2.1.0(2,6)] heptane, 1,7,7-trimethyl                                                    | -     | -     | 0.04  |
| 11 | Bicyclo [3.1.1] hept-2-ene, 2,6,6-trimethyl                                                         | -     | -     | 0.06  |
| 12 | 1-Cyclohexene-1-acetaldehyde, $\alpha$ .,2-dimethyl                                                 | -     | -     | 0.29  |
| 13 | Cyclosativene                                                                                       | -     | -     | 0.07  |
| 14 | Copaene < $\alpha$ >                                                                                | -     | -     | 0.09  |
| 15 | Cubebanol                                                                                           | -     | -     | 0.25  |
| 16 | Germacrene A                                                                                        | -     | -     | 0.05  |
| 17 | Bisabolene <(Z)-, $\gamma$ >                                                                        | -     | -     | 0.18  |
| 18 | Cadina-1,4-diene <trans->                                                                           | -     | -     | 0.04  |
| 19 | Epicubenol                                                                                          | -     | -     | 0.5   |
| 20 | Limonene                                                                                            | 0.88  | 2.52  | 0.65  |
| 21 | Geranyl linalool                                                                                    | 1.25  | 1.24  | 1.75  |
| 22 | Isogeranial                                                                                         | 4.71  | 4.65  | 5.19  |
| 23 | Cadinene < $\gamma$ >                                                                               | 1.52  | 1.59  | 2.69  |
| 24 | Neral                                                                                               | 31.33 | 36.23 | 38.42 |
| 25 | Geraniol                                                                                            | 7.48  | 3.22  | 2.52  |
| 26 | Citral                                                                                              | 36.7  | 37.66 | 39.21 |
| 27 | Geranyl acetate                                                                                     | 4.7   | 2.19  | 6.06  |
| 28 | Caryophyllene <(E)->                                                                                | 3.17  | 4.14  | 4.1   |
| 29 | 1,2,4-Metheno-1H-indene, octahydro-1,7a-dimethyl-5-(1-methylethyl)-, [1S-(1. $\alpha$ .,2. $\alpha$ | 0.35  | -     | 0.08  |
| 30 | Camphene                                                                                            | 0.14  | -     | 0.39  |
| 31 | Humulene < $\alpha$ >                                                                               | 0.44  | -     | 0.61  |

|    |                                                                          |      |      |      |
|----|--------------------------------------------------------------------------|------|------|------|
| 32 | 1,6-cyclodecadiene, 1-methyl-5-methylene-8-(1-methylethyl)-, [s- (E, E)] | 0.21 | -    | 0.63 |
| 33 | Salvene <E->                                                             | 0.12 | 0.08 | -    |
| 34 | Sulcatone                                                                | 0.45 | 0.07 | -    |
| 35 | Cadinene < $\delta$ >                                                    | -    | 0.24 | 1.51 |

Supplementary Table S3: The IUPAC name and chemical structure of different compounds obtained by GC-MS in *Cymbopogon flexuosus*

| S. no. | Compounds                                                  | IUPAC name                                                                                                                        | Chemical Structure                                                                   | Molecular Formula                                  |
|--------|------------------------------------------------------------|-----------------------------------------------------------------------------------------------------------------------------------|--------------------------------------------------------------------------------------|----------------------------------------------------|
| 1      | Propylcannabinol                                           | dimethyl-prop-2-enyl-(6,6,9-trimethyl-3-propylbenzo[c]chromen-1-yl) oxysilane                                                     | 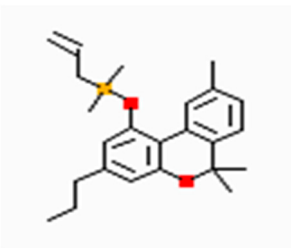   | <u>C<sub>24</sub>H<sub>32</sub>O<sub>2</sub>Si</u> |
| 2      | Elemol                                                     | Cyclohexane methanol, 4-ethenyl- $\alpha$ , $\alpha$ ,4-trimethyl-3-(1-methylethenyl)-, [1R-(1 $\alpha$ ,3 $\alpha$ ,4 $\beta$ )] |    | C <sub>15</sub> H <sub>26</sub> O                  |
| 3      | 2-(tert-Butyl)-4-methoxyphenyl acetate                     | tert-butyl 2-(4-methoxy phenyl) acetate                                                                                           |   | <u>C<sub>13</sub>H<sub>18</sub>O<sub>3</sub></u>   |
| 4      | 3-Deoxy-d-mannonic lactone                                 | 3,5-dihydroxy-6-(hydroxy methyl) oxan-2-one                                                                                       |  | <u>C<sub>6</sub>H<sub>10</sub>O<sub>5</sub></u>    |
| 5      |                                                            |                                                                                                                                   |                                                                                      |                                                    |
| 6      | Psoralidine monomethyl ether                               | Psoralidine monomethyl ether                                                                                                      |  | C <sub>21</sub> H <sub>18</sub> O <sub>5</sub>     |
| 7      | 6,6-dimethyl-2,4-heptadiene                                | (2E,4Z)-6,6-dimethylhepta-2,4-diene                                                                                               |  | <u>C<sub>9</sub>H<sub>16</sub></u>                 |
| 8      | 2-hexadecen-1-ol, 3,7,11,15-tetramethyl-, [R-[R*, R*-(E)]] | (E)-3,7,11,15-tetramethylhexadec-2-en-1-ol                                                                                        |  | <u>C<sub>20</sub>H<sub>40</sub>O</u>               |

|    |                                                               |                                                                                                                                                                                                                                                                                                                                            |                                                                                      |                                               |
|----|---------------------------------------------------------------|--------------------------------------------------------------------------------------------------------------------------------------------------------------------------------------------------------------------------------------------------------------------------------------------------------------------------------------------|--------------------------------------------------------------------------------------|-----------------------------------------------|
| 9  | Sitosterol                                                    | (1 <i>R</i> ,3 <i>aS</i> ,3 <i>bS</i> ,7 <i>S</i> ,9 <i>aR</i> ,9 <i>bS</i> ,11 <i>aR</i> )-1-[(2 <i>R</i> ,5 <i>R</i> )-5-Ethyl-6-methylheptan-2-yl]-9 <i>a</i> ,11 <i>a</i> -dimethyl-2,3,3 <i>a</i> ,3 <i>b</i> ,4,6,7,8,9,9 <i>a</i> ,9 <i>b</i> ,10,11,11 <i>a</i> -tetradecahydro-1 <i>H</i> -cyclopenta[ <i>a</i> ]phenanthren-7-ol | 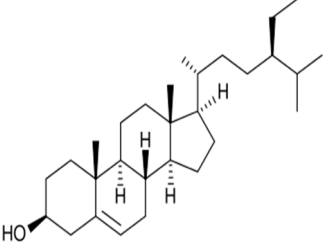   | <u>C<sub>29</sub>H<sub>50</sub>O</u>          |
| 10 | 9,19-Cyclolanost-25-en-3-ol, 24-methyl-, (3.β.,24 <i>S</i> )- | 15-(5,6-dimethylhept-6-en-2-yl)-7,7,12,16-tetramethylpentacyclo[9.7.0.0 <sup>1,3</sup> .0 <sup>3,8</sup> .0 <sup>12,16</sup> ]octadecan-6-ol                                                                                                                                                                                               |    | <u>C<sub>31</sub>H<sub>52</sub>O</u>          |
| 11 | 2,6,11,15-Tetramethylhexadeca-2,6,8,10,14-pentaene            | (6 <i>E</i> ,8 <i>E</i> ,10 <i>E</i> )-2,6,11,15-tetramethylhexadeca-2,6,8,10,14-pentaene                                                                                                                                                                                                                                                  |  | <u>C<sub>20</sub>H<sub>32</sub></u>           |
| 12 | Stigmasta-5,22-dien-3-ol                                      | (3 <i>S</i> )-17-[( <i>E</i> )-5-ethyl-6-methylhept-3-en-2-yl]-10,13-dimethyl-2,3,4,7,8,9,11,12,14,15,16,17-dodecahydro-1 <i>H</i> -cyclopenta[ <i>a</i> ]phenanthren-3-ol                                                                                                                                                                 |  | <u>C<sub>29</sub>H<sub>48</sub>O</u>          |
| 13 | Citral                                                        | 2,6-Octadienal, 3,7-dimethyl-, ( <i>E</i> )-                                                                                                                                                                                                                                                                                               |  | C <sub>10</sub> H <sub>16</sub> O             |
| 14 | 2-methoxy-4-vinylphenol                                       | 4-Ethenyl-2-methoxyphenol                                                                                                                                                                                                                                                                                                                  |  | C <sub>9</sub> H <sub>10</sub> O <sub>2</sub> |

|    |                                                    |                                                                                               |                                                                                      |                                                |
|----|----------------------------------------------------|-----------------------------------------------------------------------------------------------|--------------------------------------------------------------------------------------|------------------------------------------------|
| 15 | 2,6-octadien-1-ol, 3,7-dimethyl-, (E)              | 3,7-dimethyl-octa-2,6-dien-1-ol                                                               | 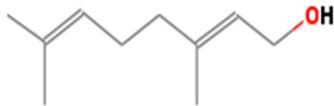   | <u>C<sub>10</sub>H<sub>18</sub>O</u>           |
| 16 | Caryophyllene                                      | (1R,4E,9S)-4,11,11-trimethyl-8-methylidenebicyclo [7.2.0] undec-4-ene                         |    | <u>C<sub>15</sub>H<sub>24</sub></u>            |
| 17 | Humulene < α >                                     | (1E,4E,8E)-2,6,6,9-Tetramethylcycloundeca-1,4-8-triene                                        |    | C <sub>15</sub> H <sub>24</sub>                |
| 18 | Cubebanol                                          | (1R,4S,5R,6R,7S,10R)-4,10-dimethyl-7-propan-2-yltricyclo [4.4.0.0 <sup>1,5</sup> ] decan-4-ol |   | <u>C<sub>15</sub>H<sub>26</sub>O</u>           |
| 19 | 4H-Pyran-4-one, 2,3-dihydro-3,5-dihydroxy-6-methyl | 3,5-dihydroxy-6-methyl-2,3-dihdropyran-4-one                                                  |  | <u>C<sub>6</sub>H<sub>8</sub>O<sub>4</sub></u> |
| 20 | Hexane, 1-bromo-6-chloro                           | 1-bromo-6-chlorohexane                                                                        |  | <u>C<sub>6</sub>H<sub>12</sub>BrCl</u>         |



|    |                                                          |                                                                               |                                                                                      |                                                  |
|----|----------------------------------------------------------|-------------------------------------------------------------------------------|--------------------------------------------------------------------------------------|--------------------------------------------------|
| 21 | 4-heptanol                                               | 4-phenylheptan-4-ol                                                           | 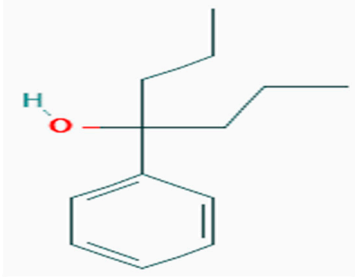   | <u>C<sub>13</sub>H<sub>20</sub>O</u>             |
| 22 | 2,4-cyclohexadiene-1-methanol, α, α, 4-trimethyl         | 2,4-Cyclohexadiene-1-methanol, α, α 4-trimethyl-p-Mentha-1,5-dien-8-ol        |    | C <sub>10</sub> H <sub>16</sub> O                |
| 23 | trans-p-Mentha-2,8-dienol                                | (3S,6R)-3-methyl-6-prop-1-en-2-ylcyclohexen-1-ol                              |   | <u>C<sub>10</sub>H<sub>16</sub>O</u>             |
| 24 | Sesquisabinene hydrate                                   | 2-methyl-5-(6-methylhept-5-en-2-yl)bicyclo [3.1.0] hexane-2-ol                |  | <u>C<sub>15</sub>H<sub>26</sub>O</u>             |
| 25 | 6-isopropenyl-3-(methoxy methoxy)-3-methyl-1-cyclohexene | 3-(methoxy methoxy)-3-methyl-6-prop-1-en-2-ylcyclohexene                      |  | <u>C<sub>12</sub>H<sub>20</sub>O<sub>2</sub></u> |
| 26 | Glutaric acid, myrtenyl 3-methylbut-2-en-1-yl ester      | 5-O-[(2E)-3,7-dimethylocta-2,6-dienyl] 1-O-(3-methylbut-2-enyl) pentanedioate |  | <u>C<sub>20</sub>H<sub>32</sub>O<sub>4</sub></u> |

|    |                                                                                           |                                                                                                                                                        |                                                                                      |                                                |
|----|-------------------------------------------------------------------------------------------|--------------------------------------------------------------------------------------------------------------------------------------------------------|--------------------------------------------------------------------------------------|------------------------------------------------|
| 27 | Cholest-8-en-3-ol                                                                         | (9R,10S,13R,17R)-10,13-dimethyl-17-[(2R)-6-methylheptan-2-yl]-2,3,4,5,6,7,9,11,12,15,16,17-dodecahydro-1H-cyclopenta[a]phenanthren-3-ol                | 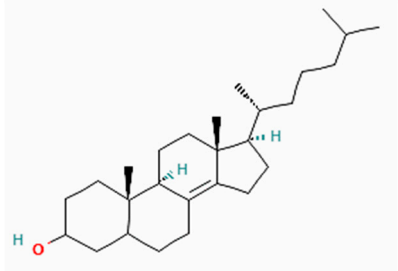   | <u>C<sub>27</sub>H<sub>46</sub>O</u>           |
| 28 | Octadecanal                                                                               | Octadecanal                                                                                                                                            |    | C <sub>18</sub> H <sub>36</sub> O              |
| 29 | Bicyclo [3.1.1] heptan-3-one, 2-hydroxy-2,6,6-trimethyl                                   | 2-hydroxy-2,6,6-trimethyl bicyclo [3.1.1] heptan-3-one                                                                                                 |    | C <sub>10</sub> H <sub>16</sub> O <sub>2</sub> |
| 30 | 17-(1,5-Dimethyl-3-phenylthiohex-4-enyl)-4,4,10,13,14-pentamethyl-2,3,4,5,6,7,10,11,12,13 | 4-ethenyl-10,13-dimethyl-17-(6-methylheptan-2-yl)-2,3,4,5,6,7,8,9,11,12,14,15,16,17-tetradecahydro-1H-cyclopenta[a]phenanthren-3-ol                    |   | <u>C<sub>29</sub>H<sub>50</sub>O</u>           |
| 31 | Ergost-5-en-3-ol                                                                          | (8S,9S,10R,13R,14S,17R)-17-[(2R,5S)-5,6-dimethylheptan-2-yl]-10,13-dimethyl-2,3,4,7,8,9,11,12,14,15,16,17-dodecahydro-1H-cyclopenta[a]phenanthren-3-ol |  | <u>C<sub>28</sub>H<sub>48</sub>O</u>           |
| 32 | Stigmasterol                                                                              | (3S,8S,9S,10R,13R,14S,17R)-17-[(E,2R,5S)-5-ethyl-6-methylhept-3-en-2-yl]-10,13-dimethyl-2,3,4,7,8,9,11,12,14,15,16,17-dodecahydro-1H-                  |  | C <sub>29</sub> H <sub>48</sub> O              |

|    |                                                         |                                                                                                                                                       |                                                                                      |                   |
|----|---------------------------------------------------------|-------------------------------------------------------------------------------------------------------------------------------------------------------|--------------------------------------------------------------------------------------|-------------------|
|    |                                                         | cyclopenta[a]phenanthren-3-ol                                                                                                                         |                                                                                      |                   |
| 33 | 2E,6E)-3,7,11-trimethyldodeca-2,6,10-trienyl propionate | methyl 3,7,11-trimethyldodeca-2,6,10-trienoate                                                                                                        |    | $C_{16}H_{26}O_2$ |
| 34 | 2,6-Octadienal, 3,7-dimethyl-, (E)                      | 3,7-dimethylocta-2,6-dienal                                                                                                                           |    | $C_{10}H_{16}O$   |
| 35 | Licarín A                                               | 2-methoxy-4-(7-methoxy-3-methyl-5-prop-1-enyl-2,3-dihydro-1-benzofuran-2-yl) phenol                                                                   |    | $C_{20}H_{22}O_4$ |
| 36 | Geranyl linalool                                        | 3,7,11,15-tetramethylhexadeca-1,6,10,14-tetraen-3-ol                                                                                                  |   | $C_{20}H_{34}O$   |
| 37 | m- Camphorene                                           | 5-(6-methylhepta-1,5-dien-2-yl)-1-(4-methylpent-3-enyl) cyclohexene                                                                                   |  | $C_{20}H_{32}$    |
| 38 | Squalene                                                | (6E,10E,14E,18E)-2,6,10,15,19,23-hexamethyltetracos-2,6,10,14,18,22-hexaene                                                                           |  | $C_{30}H_{50}$    |
| 39 | Palmitic acid                                           | [(2Z)-3,7-dimethylocta-2,6-dienyl] hexadecanoate                                                                                                      |  | $C_{26}H_{48}O_2$ |
| 40 | Lanosterol                                              | (3S,5R,10S,13R,14R,17R)-4,4,10,13,14-pentamethyl-17-[(2R)-6-methylhept-5-en-2-yl]-2,3,5,6,7,11,12,15,16,17-decahydro-1H-cyclopenta[a]phenanthren-3-ol |  | $C_{30}H_{50}O$   |

|    |                                                                                             |                                                                                                                                              |                                                                                      |                                                  |
|----|---------------------------------------------------------------------------------------------|----------------------------------------------------------------------------------------------------------------------------------------------|--------------------------------------------------------------------------------------|--------------------------------------------------|
| 41 | Geranyl stearate                                                                            | [(2E)-3,7-dimethylocta-2,6-dienyl] octa decanoate                                                                                            |    | <u>C<sub>28</sub>H<sub>52</sub>O<sub>2</sub></u> |
| 42 | Geranyl linolenate                                                                          | [(2E)-3,7-dimethylocta-2,6-dienyl] (9Z,12Z,15Z)-octadeca-9,12,15-trienoate                                                                   |    | <u>C<sub>28</sub>H<sub>46</sub>O<sub>2</sub></u> |
| 43 | D:C-Friedo-B': A'-neogammacer-9(11)-ene, 3-methoxy-, (3. β.)-                               | (9-acetyloxy-3a,5a,8,8,11a,13a-hexamethyl-3-propan-2-yl-1,2,3,4,5,5b,6,7,7a,9,10,11,13,13b-tetradecahydrocyclopenta[a]chrysen-10-yl) acetate |    | <u>C<sub>34</sub>H<sub>54</sub>O<sub>4</sub></u> |
| 44 | Geranyl acetate                                                                             | 3,7-dimethylocta-2,6-dienyl acetate                                                                                                          |  | C <sub>12</sub> H <sub>20</sub> O <sub>2</sub>   |
| 45 | Geranyl linoleate                                                                           | [(2E)-3,7-dimethylocta-2,6-dienyl] (9Z,12Z)-octadeca-9,12-dienoate                                                                           |  | <u>C<sub>28</sub>H<sub>48</sub>O<sub>2</sub></u> |
| 46 | 1,2,3,4,4a,5,6,8a-octahydro-7-methyl-4-methylene-1-(1-methylethyl)-, (1. α, / Neophytadiene | 1,2,3,4,4a,5,6,8a-octahydro-7-methyl-4-methylene-1-(1-methylethyl)-, (1. α,4aβ,8aα)                                                          |  | C <sub>15</sub> H <sub>24</sub>                  |
| 47 | 6-Methyl-4,6-bis(4-methylpent-3-en-1-yl) cyclohexa-1,3-dienecarbaldehyde                    | 6-Methyl-4,6-bis(4-methylpent-3-en-1-yl) cyclohexa-1,3-dienecarbaldehyde                                                                     |  | C <sub>20</sub> H <sub>30</sub> O                |

|    |                                                                                                 |                                                                                                |                                                                                      |                   |
|----|-------------------------------------------------------------------------------------------------|------------------------------------------------------------------------------------------------|--------------------------------------------------------------------------------------|-------------------|
| 48 | Vitamin E                                                                                       | (2R)-2,5,7,8-Tetramethyl-2-[(4R,8R)-4,8,12-trimethyltridecyl]-3,4-dihydro-2H-1-benzopyran-6-ol | 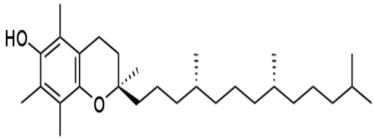   | $C_{29}H_{50}O_2$ |
| 49 | Citronellyl linolenate                                                                          | 3,7-dimethyloct-6-en-1-ol;(9Z,12Z,15Z)-octadeca-9,12,15-trienoic acid                          |    | $C_{28}H_{48}O_2$ |
| 50 | 1,2,3,4,4a,5,6,8a-octahydro-7-methyl-4-methylene-1-(1-methylethyl)-, (1. $\alpha$ , Naphthalene | (3S,8aS)-5,8a-dimethyl-3-prop-1-en-2-yl-2,3,4,4a,7,8-hexahydro-1H-naphthalene                  |    | $C_{15}H_{24}$    |
| 51 | 2,6,10,14-Hexadecatetraen-1-ol, 3,7,11,15-tetramethyl-, acetate, (E, E, E)-                     | (2Z,6E,10E)-3,7,11,15-tetramethylhexadeca-2,6,10,14-tetraen-1-ol                               |   | $C_{20}H_{34}O$   |
| 52 | $\beta$ -Citral                                                                                 | (3E)-3,7-dimethylocta-3,6-dienal                                                               |  | $C_{10}H_{16}O$   |
| 53 | Monopentyl Phthalate                                                                            | 2-pentoxycarbonylbenzoic acid                                                                  |  | $C_{13}H_{16}O_4$ |
| 54 | 2,2-Dimethylocta-3,4-dienal                                                                     | 2,2-Dimethylocta-3,4-dienal                                                                    |  | $C_{10}H_{16}O$   |
| 55 | Citronellal                                                                                     | 3,7-dimethyloct-6-enal                                                                         |  | $C_{10}H_{18}O$   |

|    |                                                |                                                                                       |                                                                                      |                                      |
|----|------------------------------------------------|---------------------------------------------------------------------------------------|--------------------------------------------------------------------------------------|--------------------------------------|
| 56 | p-Menth-3-en-9-ol                              | 2-(4-methylcyclohexen-1-yl) propan-1-ol                                               | 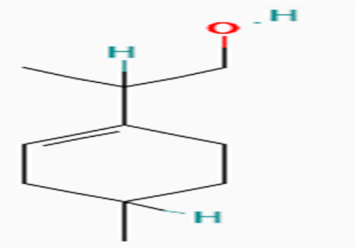   | <u>C<sub>10</sub>H<sub>18</sub>O</u> |
| 57 | $\alpha$ - Ylangene                            | (1S,6R,7R,8S)-1,3-dimethyl-8-(propan-2-yl) tricyclo[4.4.0.0 <sup>2,7</sup> ]dec-3-ene |    | C <sub>15</sub> H <sub>24</sub>      |
| 58 | Germacrene D                                   | (S,1Z,6Z)-8-isopropyl-1-methyl-5-methylidenecyclodeca-1,6-diene                       |   | C <sub>15</sub> H <sub>24</sub>      |
| 59 | Cuparene                                       | 1-methyl-4-[(1R)-1,2,2-trimethylcyclopentyl] benzene                                  |  | C <sub>15</sub> H <sub>22</sub>      |
| 60 | Bisabolene                                     | (4S)-1-methyl-4-(6-methylhepta-1,5-dien-2-yl) cyclohexene                             |  | C <sub>15</sub> H <sub>24</sub>      |
| 61 | Tricyclo[2.2.1.0(2,6)]heptane, 1,7,7-trimethyl | Tricyclo[2.2.1.0(2,6)]heptane, 1,7,7-trimethyl                                        |  | C <sub>10</sub> H <sub>16</sub>      |

|    |                                                    |                                                                                                                 |                                                                                      |                                      |
|----|----------------------------------------------------|-----------------------------------------------------------------------------------------------------------------|--------------------------------------------------------------------------------------|--------------------------------------|
| 62 | Bicyclo [3.1.1] hept-2-ene, 2,6,6-trimethyl- dimer | 2,6,6-trimethyl bicyclo [3.1.1] hept-2-ene                                                                      | 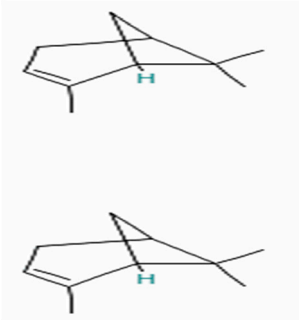   | <u>C<sub>20</sub>H<sub>32</sub></u>  |
| 63 | 1-Cyclohexene-1-acetaldehyde, α,2-dimethyl         | 2-(2-methyl-5-prop-1-en-2-ylcyclohex-2-en-1-yl) propanal                                                        |    | <u>C<sub>13</sub>H<sub>20</sub>O</u> |
| 64 | Cyclosativene                                      | (1S,2S,3R,4S,6R,7R,8S)-1,2-dimethyl-8-propan-2-yl tetracyclo [4.4.0.0 <sup>2,4</sup> .0 <sup>3,7</sup> ] decane |  | <u>C<sub>15</sub>H<sub>24</sub></u>  |
| 65 | Copaene <α>                                        | (1R,2S,6S,7S,8S)-8-isopropyl-1,3-dimethyltricyclo [4.4.0.0 <sup>2,7</sup> ] dec-3-ene                           |  | C <sub>15</sub> H <sub>24</sub>      |
| 66 | Germacrene A                                       | S,1Z,6Z)-8-isopropyl-1-methyl-5-methylidenecyclodeca-1,6-diene                                                  |  | <u>C<sub>15</sub>H<sub>24</sub></u>  |

|    |                             |                                                                                        |                                                                                      |                                      |
|----|-----------------------------|----------------------------------------------------------------------------------------|--------------------------------------------------------------------------------------|--------------------------------------|
| 67 | Bisabolene <(Z), $\gamma$ > | (4Z)-1-methyl-4-(6-methylhept-5-en-2-ylidene) cyclohexene                              | 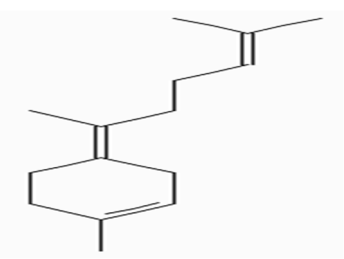   | <u>C<sub>15</sub>H<sub>24</sub></u>  |
| 68 | Cadina-1,4-diene <trans->   | (1S,4R)-1,6-dimethyl-4-propan-2-yl-1,2,3,4,4a,7-hexahydronaphthalene                   |    | C <sub>15</sub> H <sub>24</sub>      |
| 69 | Epicubenol                  | (1S,4R,4aS,8aR) -4,7-dimethyl-1-propan-2-yl-2,3,4,5,6,8a-hexahydro-1H-naphthalen-4a-ol |   | <u>C<sub>15</sub>H<sub>26</sub>O</u> |
| 70 | Limonene                    | 1-Methyl-4-(prop-1-en-2-yl) cyclohex-1-ene                                             |  | C <sub>10</sub> H <sub>16</sub>      |
| 71 | Linalool                    | 3,7-dimethyl-1,6-octadien-3-ol                                                         |  | C <sub>10</sub> H <sub>18</sub> O    |



|    |              |                                                                                                  |                                                                                      |                                     |
|----|--------------|--------------------------------------------------------------------------------------------------|--------------------------------------------------------------------------------------|-------------------------------------|
| 72 | Isogeranial  | (3Z)-3,7-dimethylocta-3,6-dien-1-ol                                                              | 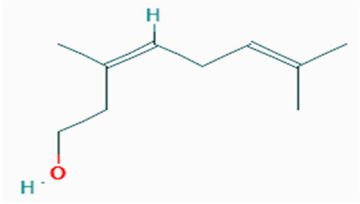   | C <sub>10</sub> H <sub>18</sub> O   |
| 73 | Cadinene <γ> | 7-methyl-4-methylidene-1-propan-2-yl-2,3,4a,5,6,8a-hexahydro-1H-naphthalene                      |    | C <sub>15</sub> H <sub>24</sub>     |
| 74 | Neral        | (2Z)-3,7-dimethylocta-2,6-dienal                                                                 |   | C <sub>10</sub> H <sub>16</sub> O   |
| 75 | Geraniol     | (2E)-3,7-Dimethylocta-2,6-dien-1-ol                                                              |  | C <sub>10</sub> H <sub>18</sub> O   |
| 76 | Camphene     | 3- [2-(3,3-dimethyl-2-bicyclo [2. 2. 1] heptanyl) ethenyl]-2,2-dimethyl bicyclo [2. 2.1] heptane |  | <u>C<sub>10</sub>H<sub>16</sub></u> |
| 77 | Salvene <E>  | (E)-6-methyl-5-methylidenehept-2-ene                                                             |  | C <sub>9</sub> H <sub>16</sub>      |

|    |                |                                                                       |                                                                                    |                                     |
|----|----------------|-----------------------------------------------------------------------|------------------------------------------------------------------------------------|-------------------------------------|
| 78 | Sulcatone      | 6-methylhept-5-en-2-one                                               | 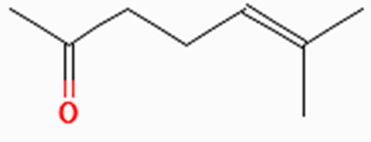 | <u>C<sub>8</sub>H<sub>14</sub>O</u> |
| 79 | Cadinene < δ > | (1S,8aR)-4,7-dimethyl-1-propan-2-yl-1,2,3,5,6,8a-hexahydronaphthalene |  | <u>C<sub>15</sub>H<sub>24</sub></u> |
